# Supplementary material for: Preventive effect of low-carbohydrate high-fat dietary pattern on liver disease caused by alcohol consumption via a 6pgd-involved mechanism in mice
Source: Royal Society of Chemistry journal article supplement (doi:10.1039/d3fo04335e), 2023-12-07

### Original Western Blots

**Note:** For the sake of high efficiency and antibody savings, we did not choose to incubate one band with a whole membrane, but instead took a tailoring approach.

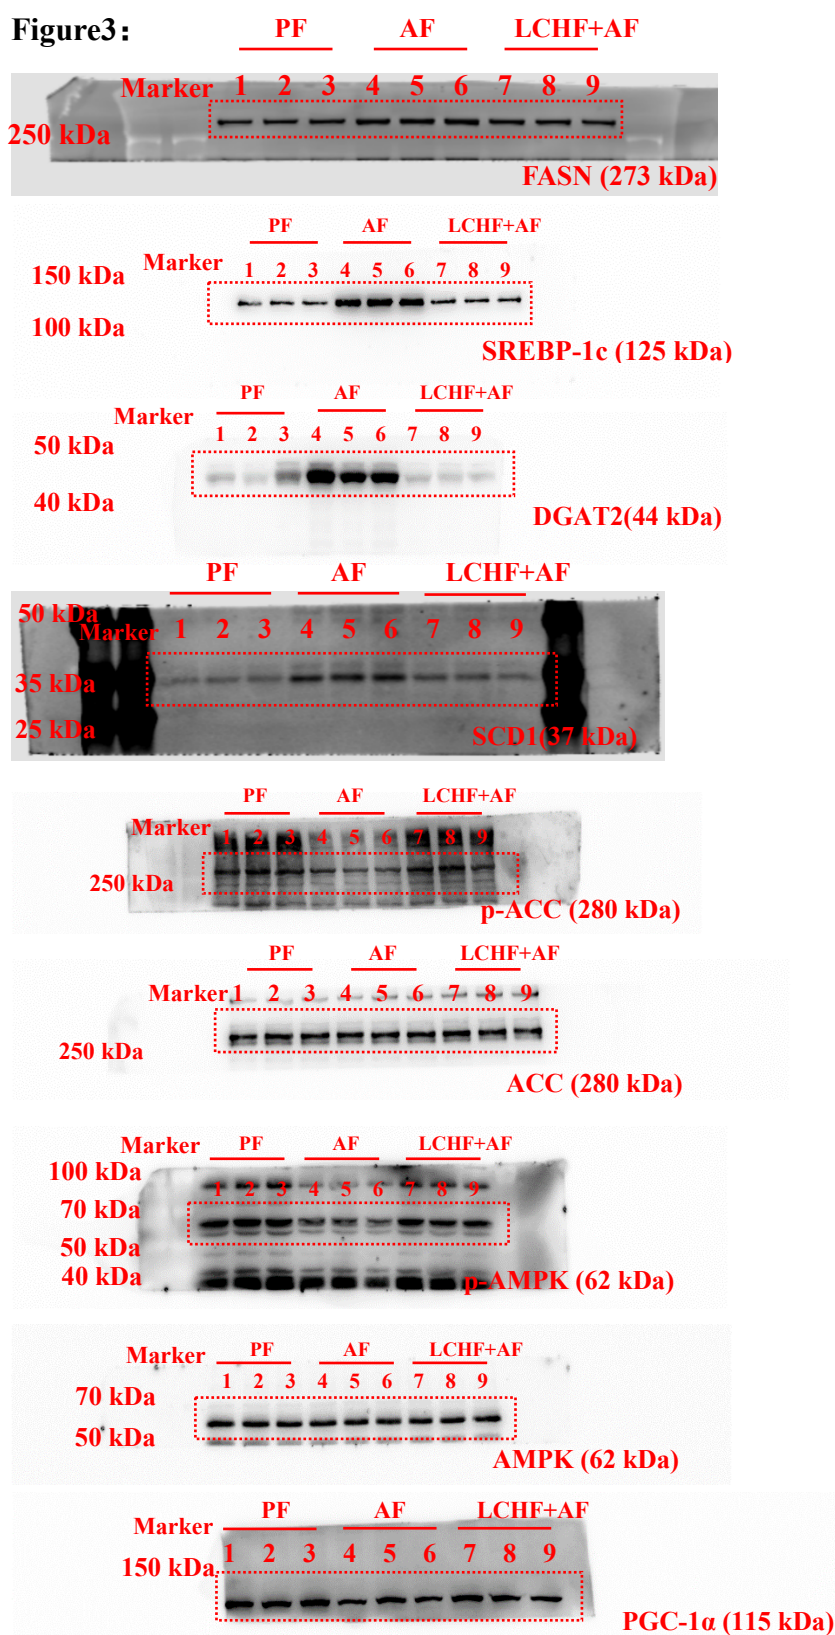

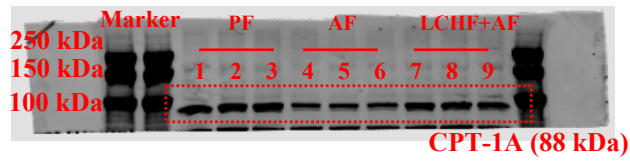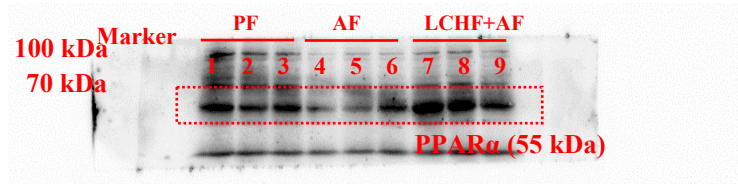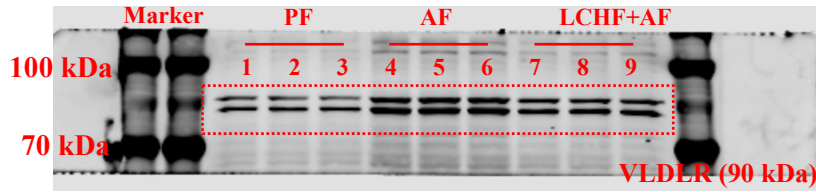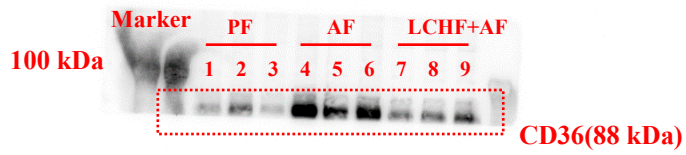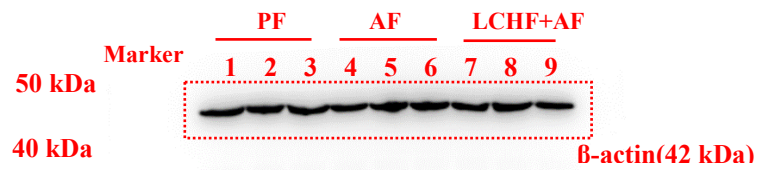

**Figure4:**

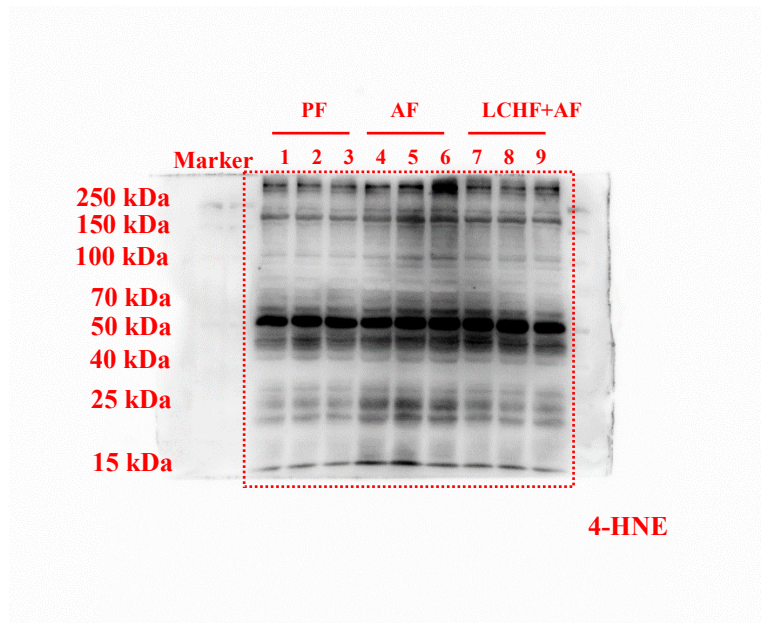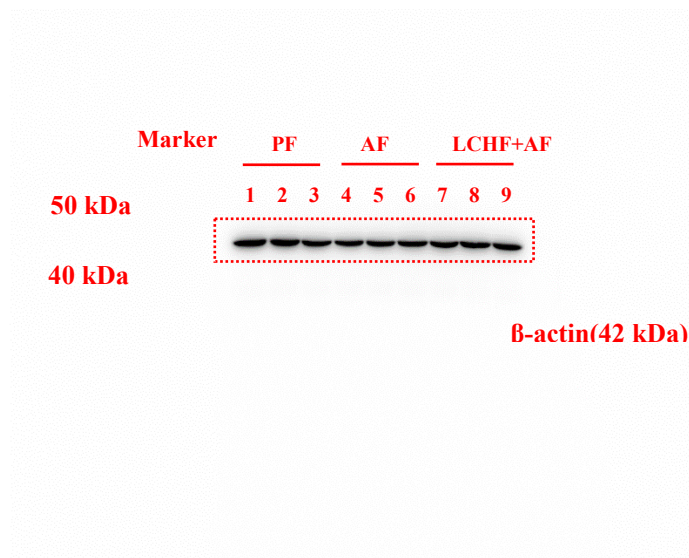

**Figure5:**

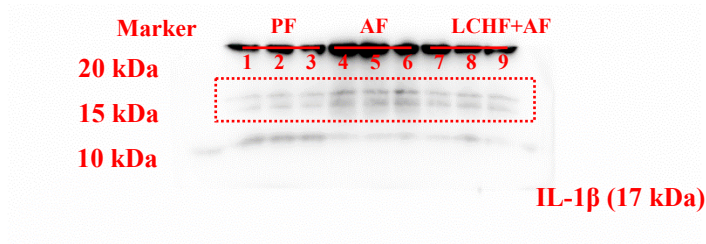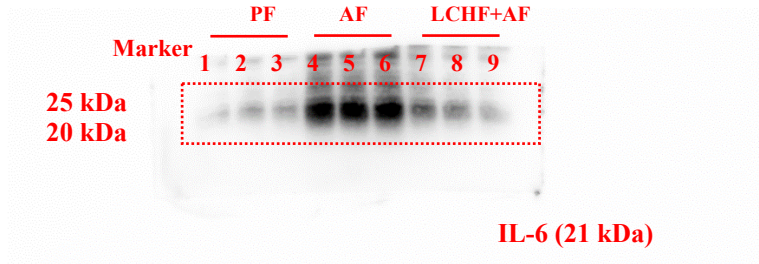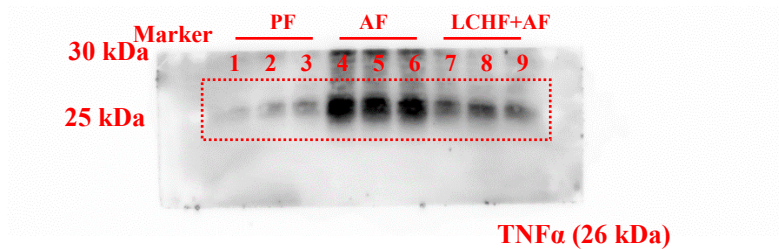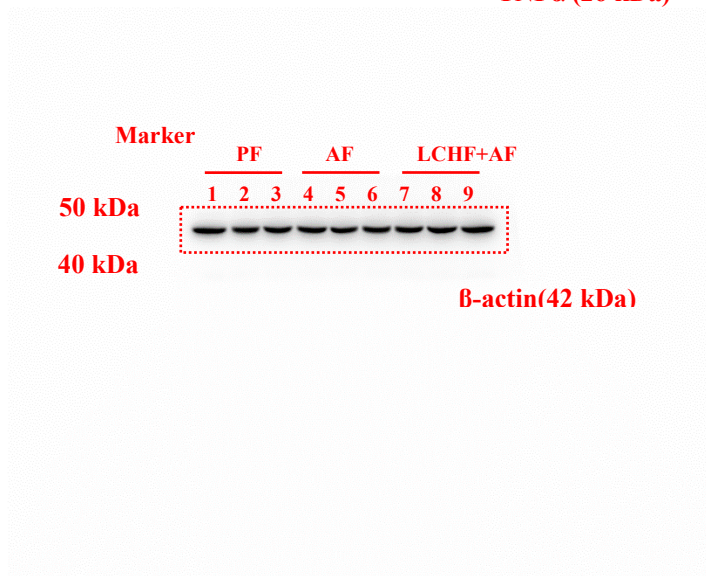



**Figure9:**

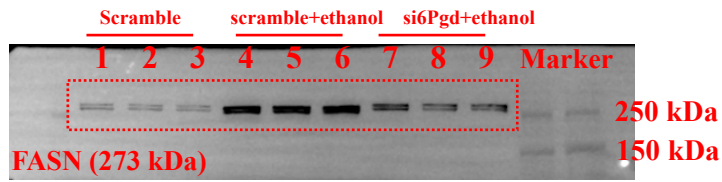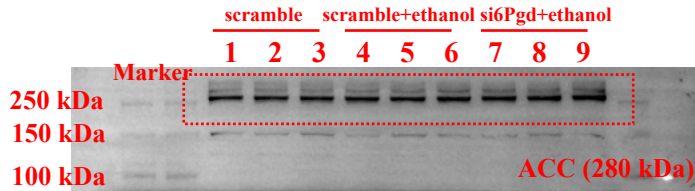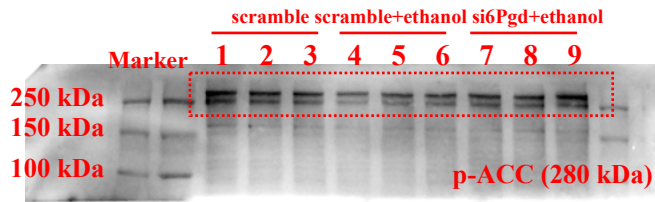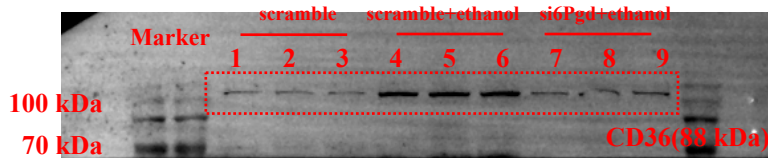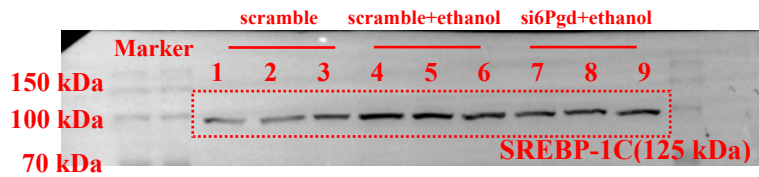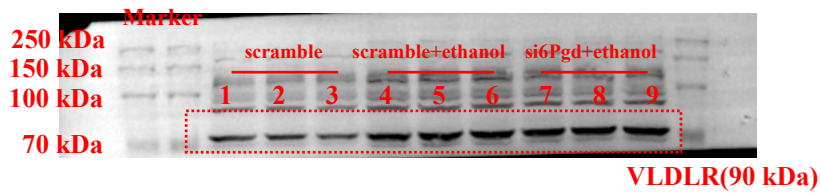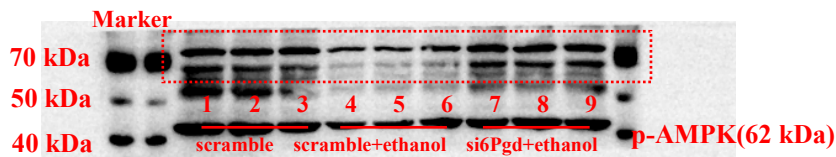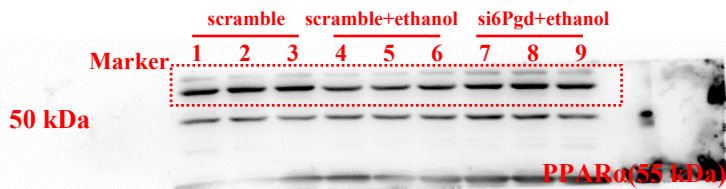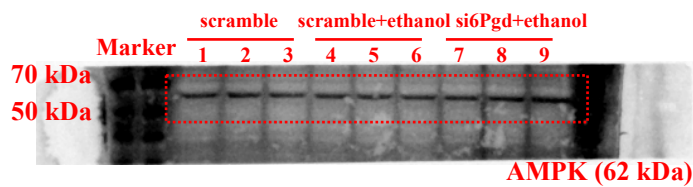

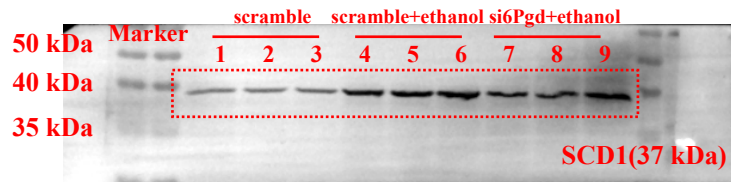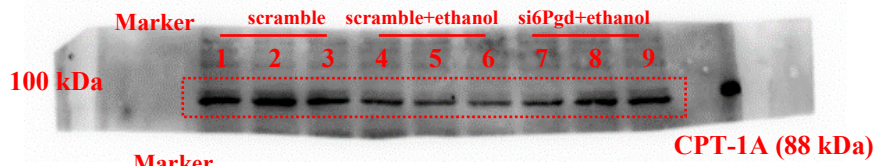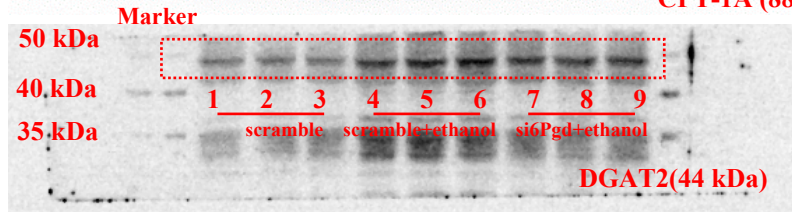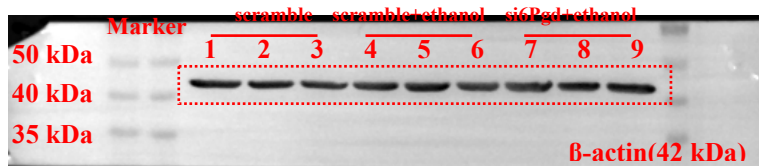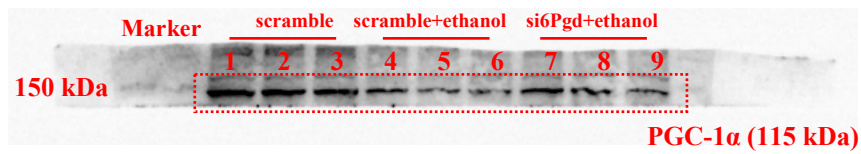

Supplementary Figure 3:

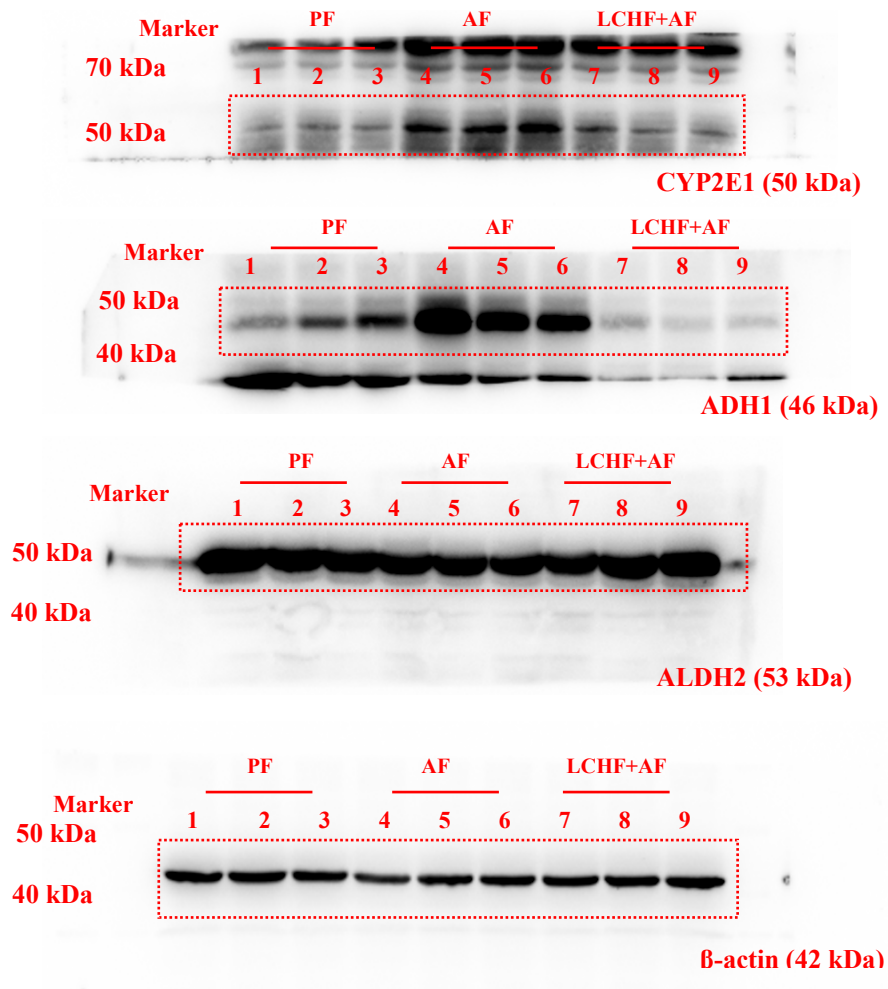

Supplement: d3fo04335e1.pdf [file d3fo04335e1.pdf]
