# Supplementary material for: Preventive effect of low-carbohydrate high-fat dietary pattern on liver disease caused by alcohol consumption via a 6pgd-involved mechanism in mice
Source: Royal Society of Chemistry journal article supplement (doi:10.1039/d3fo04335e), 2023-12-07
Supplement: d3fo04335e2.pdf [file d3fo04335e2.pdf]

## Supplementary Materials

### **Preventive effect of low-carbohydrate high-fat dietary pattern on liver disease during drinking via a 6pgd-involved mechanism in mice**

Jiannan Qiu<sup>1, 2, #</sup>, Fan Dong<sup>1, #</sup>, Hui Zhuge<sup>2, #</sup>, Qiang Han<sup>1</sup>, Jiaomei Li<sup>1</sup>, Rui Guo<sup>1</sup>,  
Xiaobing Dou<sup>2</sup>, Jiayu Li<sup>1</sup>, Songtao Li<sup>1, 3, \*</sup>

<sup>1</sup> School of Public Health, Zhejiang Chinese Medical University, Hangzhou, Zhejiang,  
PR. China

<sup>2</sup> School of Life Science, Zhejiang Chinese Medical University, Hangzhou, Zhejiang,  
PR. China

<sup>3</sup> Department of Clinical Nutrition, Affiliated Zhejiang Hospital, School of Medicine,  
Zhejiang University, Hangzhou, Zhejiang, PR. China

# These authors contribute equally to this paper.

\*To whom correspondence should be addressed E-mail: [lisongtao@zcmu.edu.cn](mailto:lisongtao@zcmu.edu.cn) (S.  
Li).

## Supplementary table

Table S1. Primers design for Real-Time PCR.

| Gene name            | Forward (5'-3')        | Reverse (5'-3')          |
|----------------------|------------------------|--------------------------|
| <i>Rtn4rl2</i>       | TCTGCACCTGCTACTCCTCC   | AGCGGATGAGGTTGTTCTGC     |
| <i>1810010H24Rik</i> | TCCTCCCGACGGCTTTTTC    | ATTCTGGACACGGCTTATGGC    |
| <i>Fdps</i>          | GGAGGTCCTAGAGTACAATGCC | AAGCCTGGAGCAGTTCTACAC    |
| <i>Mpo</i>           | AGTTGTGCTGAGCTGTATGGA  | CGGCTGCTTGAAGTAAAACAGG   |
| <i>Cyp51</i>         | GACAGGAGGCAACTTGCTTTC  | GTGGACTTTTCGCTCCAGC      |
| <i>Sqle</i>          | ATAAGAAATGCGGGGATGTCAC | ATATCCGAGAAGGCAGCGAAC    |
| <i>Cd63</i>          | GAAGCAGGCCATTACCCATGA  | TGACTTCACCTGGTCTCTAAACA  |
| <i>Acly</i>          | ACCCTTTCCTGCGGATCACA   | GACAGGGATCAGGATTTCTTG    |
| <i>Acss2</i>         | AAACACGCTCAGGGAAAATCA  | ACCGTAGATGTATCCCCAGG     |
| <i>Ccnd1</i>         | GCGTACCCTGACACCAATCTC  | CTCCTCTTCGCACTTCTGCTC    |
| <i>Arhgdib</i>       | ATGACGGAGAAGGATGCACAG  | CTCCCAGCAGTGTCTTCTGTGA   |
| <i>Rtn4</i>          | TGCCTTCATTGTTTGTCTGGG  | TTCTAGCTGCTGATAGGCGA     |
| <i>Itga9</i>         | AAGTGTCGTGTCCATACCAAC  | GGTCTGCTTCGTAGTAGATGTTC  |
| <i>Dact2</i>         | GTGTACCCATATCCCAGCCC   | TCCTGCCCCACATCTCTCAG     |
| <i>Ngp</i>           | AGACCTTTGTATTGGTGGTGGC | GGTTGTATGCCTCTATGGCTCTA  |
| <i>Abcc4</i>         | GGCACTCCGGTTAAGTAACTC  | TGTCACTTGGTTCGAATTTGTTCA |
| <i>Mmd2</i>          | AGTATGAACACGCAGCAAAC   | TCCCAGTCGTCATCGGACA      |
| <i>Igkv3-4</i>       | GCAACCTCTGCGACCATCAT   | CTGGAGATTGGGTCAGCACA     |
| <i>Lepr</i>          | TGGTCCCAGCAGCTATGGT    | ACCCAGAGAAGTTAGCACTGT    |
| <i>Ltf</i>           | TGAGGCCCTTGGACTCTGT    | ACCCACTTTTCTCATCTCGTTC   |
| <i>Camp</i>          | GCTGTGGCGGTCCTACTATCAC | TGTCTAGGGACTGCTGGTTGA    |
| <i>Pgd</i>           | ATGGCCCAAGCTGACATTG    | GCACAGACCACAAATCCATGAT   |
| <i>Pygb</i>          | CCGCGACTACTTCTTCGCTC   | CAACCCCAACTGATAAGTGGC    |
| <i>Igkv17-127</i>    | GGGGAACCTCCTAAGCTCCT   | CTGGAGAATCGGGATGGGAC     |
| <i>Angptl4</i>       | CATCCTGGGACGAGATGAACT  | TGACAAGCGTTACCACAGGC     |
| <i>H2ac19</i>        | ATAAAAGGGTGAGGCGTCGG   | TTGTTGAGCTCCTCGTCGTT     |

---

|                |                         |                         |
|----------------|-------------------------|-------------------------|
| <i>mt-Nd4l</i> | TCCATACCAATCCCCATCACC   | ACGTAATCTGTTCCGTACGTGTT |
| <i>Rn7sk</i>   | TCCATTGTAGGAGAACGTAGGG  | AGCGCCTCATTTGGATGT      |
| <i>Obp2a</i>   | GACCTGGTGGATTACTCTGGG   | TGAAAAGCGGTGTATTTGCCA   |
| <i>Sult5a1</i> | ATGACTGAGCGCATGAACACC   | CCACAAGTGACCCTCACAGA    |
| <i>Capn8</i>   | CTCTAACCAGAATGCTGTGAAGT | GTAGCCCAAAGCTGACGGA     |
| <i>Rnase2a</i> | TGGAGCAACTTGAGTCTCGAC   | CGGGGATAGGCTCTGTTATAGA  |
| <i>18s</i>     | AGGTCTGTGATGCCCTTAGA    | GAATGGGGTTCAACGGGTTA    |

---

Supplementary Figures  
Supplementary Figure 1.

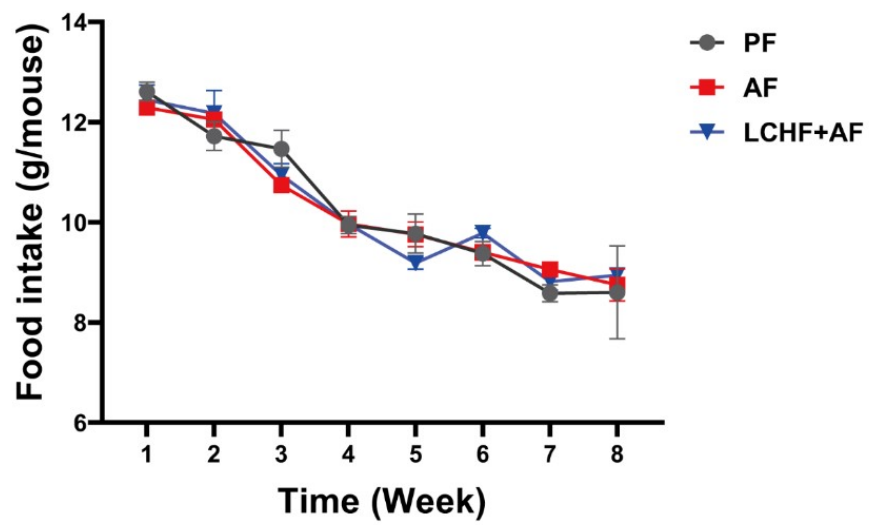

Figure S1. There is no statistic difference in food intake among the experimental groups. The daily food intake curve. Data are presented as means  $\pm$  SD ( $n = 8$ ).

Supplementary Figure 2.

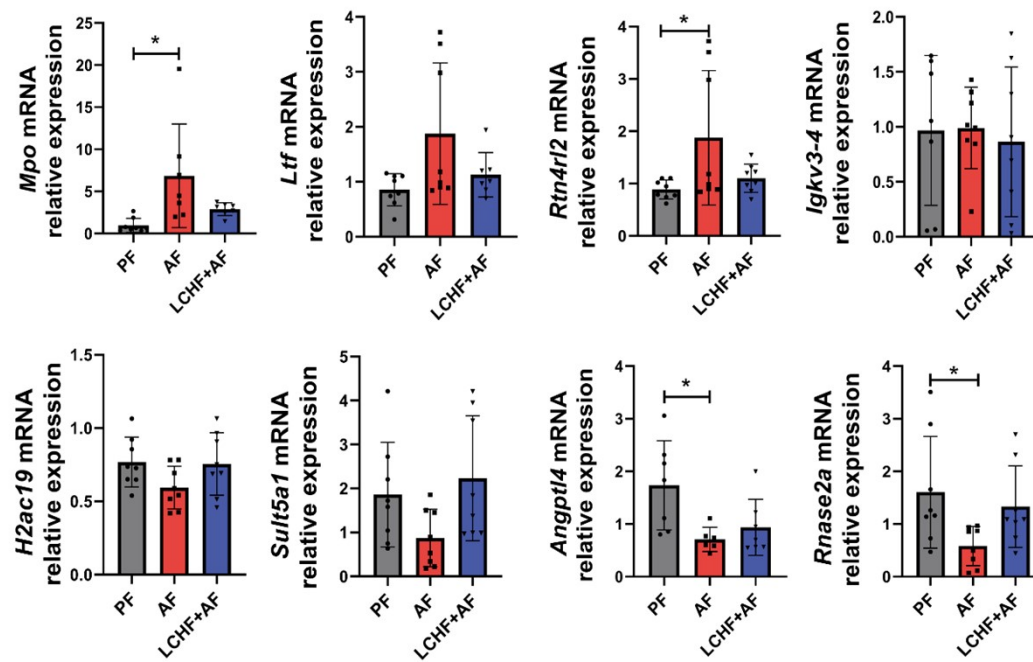

Figure S2. qPCR was employed to validate the differentially expressed genes in liver samples. The mRNA levels of *Mpo*, *Ltf*, *Rtn4r12*, *Igkv3-4*, *H2ac19*, *Igkv3-4*, *Sult5a*, *Angptl4*, and *Rnase2a*. Data are presented as means ± SD (n = 8). \*P < 0.05 and \*\*P < 0.01 indicate statistically significant.

Supplementary Figure 3.

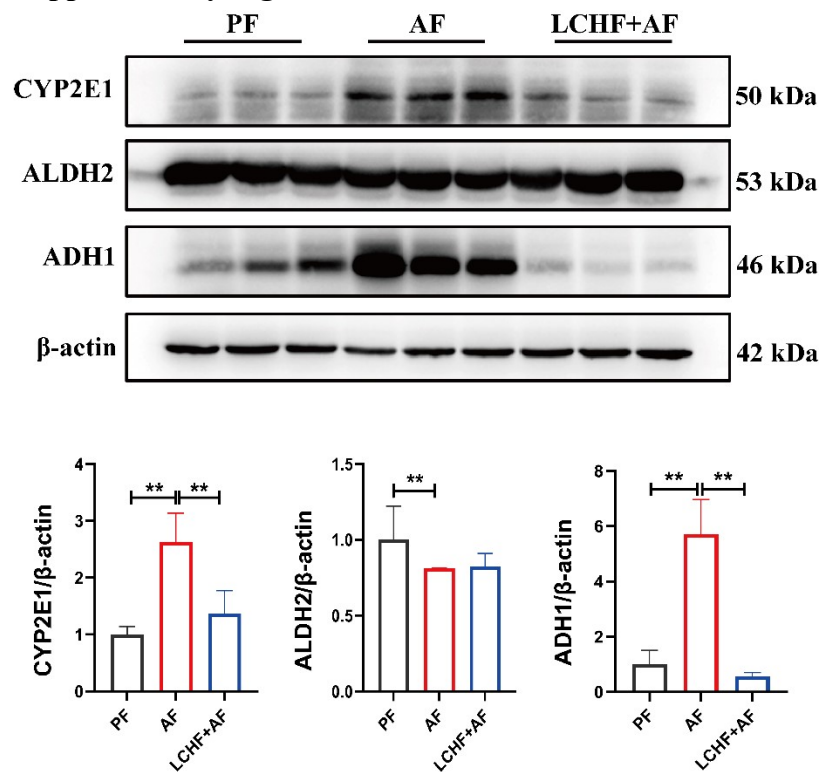

Figure S3. The LCHF dietary pattern improves the alcohol metabolism in mice. The expressions of CYP2E1, ALDH2, and ADH1 in mice liver were detected by Western-blot. Data are presented as means  $\pm$  SD ( $n = 3$ ). \* $P < 0.05$  and \*\* $P < 0.01$  indicate statistically significant.

### Supplementary Figure 4.

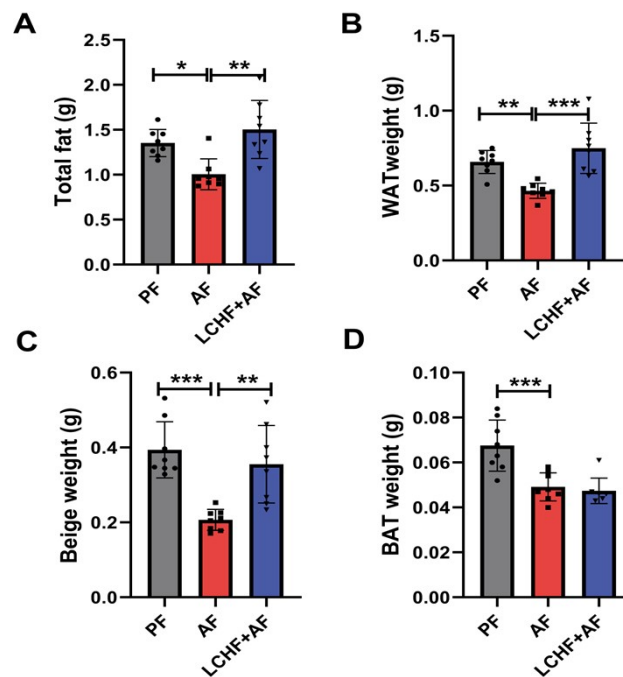

Figure S4. LCHF-diet rescued alcohol-induced adipose tissues loss. The weight of (A) Total fat weight, (B) White adipose tissue (WAT) weight, (C) Beige weight, (D) Brown adipose tissue (BAT) weight. Data are presented as means  $\pm$  SD (n = 8). \* $P < 0.05$  and \*\* $P < 0.01$  indicate statistically significant.
